# Supplementary material for: Structure reconstruction of TiO2-based multi-wall nanotubes: first-principles calculations
Source: Royal Society of Chemistry journal article supplement (doi:10.1039/c4cp00903g), 2014-01-01
Supplement: c4cp00903g1.pdf [file c4cp00903g1.pdf]

Table S1. Energetic and structural properties of double-walled (DW NT) and merged single-walled (CSW NT) TiO<sub>2</sub> NTs obtained from layers with hexagonal fluorite morphology. Comparison of results obtained using PBE0 and PBE0-D methods.

| Nanotube, armchair |        | $E_f^a$ |        | $E_{str}^a$ |        | $E_{bind}^a$ |        | $w_{NT}^b$ |        | $D_{NT}^c$ |        |
|--------------------|--------|---------|--------|-------------|--------|--------------|--------|------------|--------|------------|--------|
|                    |        | kJ/mol  |        |             |        | Å            |        |            |        |            |        |
|                    |        | PBE0    | PBE0-D | PBE0        | PBE0-D | PBE0         | PBE0-D | PBE0       | PBE0-D | PBE0       | PBE0-D |
| (12, 12)@(18, 18)  | DW NT  | 47.5    | 72.9   | 3.9         | -4.2   | -3.5         | -13.4  | 2.0        | 2.0    | 24.7       | 24.6   |
|                    | CSW NT | 48.5    | 76.0   | 4.9         | -1.1   | -2.5         | -10.3  | 5.9        | 5.9    | 25.3       | 25.3   |
| (10, 10)@(15, 15)  | DW NT  | 53.1    | 77.8   | 9.5         | 0.7    | -1.1         | -12.9  | 1.9        | 1.9    | 20.7       | 20.7   |
|                    | CSW NT | 44.5    | 71.2   | 0.9         | -5.9   | -9.7         | -19.4  | 5.4        | 4.9    | 22.1       | 21.8   |

<sup>a</sup>Formation energy,  $E_f$ , strain energy,  $E_{str}$ , and binding energy,  $E_{bind}$ .

<sup>b</sup>The average wall thickness in NT relaxed structures.

<sup>c</sup>The average diameter calculated as the sum of radial distances to outmost and innermost (oxygen) atoms in NT relaxed structures.
